# Supplementary material for: Grafting polyphenyl-like films on metallic surfaces using galvanic anodes
Source: Royal Society of Chemistry journal article supplement (doi:10.1039/c3ra41821a), 2013-01-01
Supplement: c3ra41821a.pdf [file c3ra41821a.pdf]

## Electronic Supplementary Information

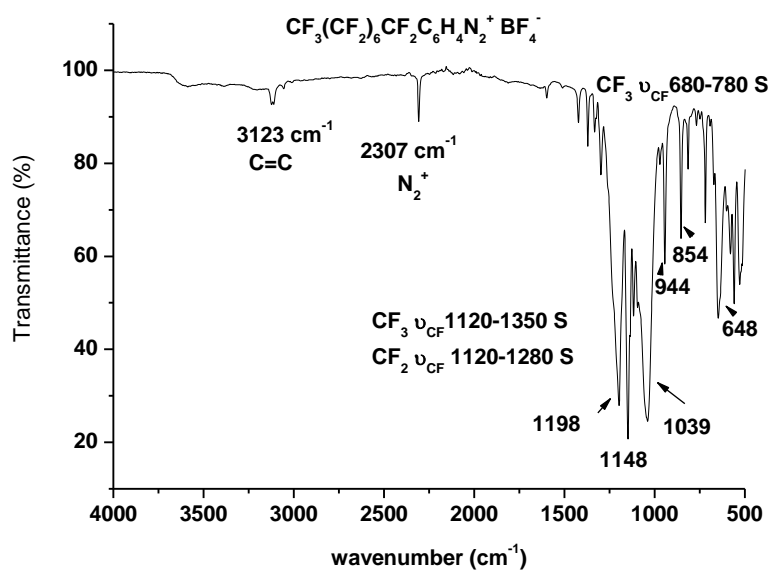

Supp Inf. Figure 1: IR spectrum of heptadecylfluorooctylbenzene diazonium tetrafluoroborate (HDFOBDT).

Supp. Inf. Table 1: Standard Potentials

| Electrode                                                  | Potential vs<br>Hydrogen electrode (V) |
|------------------------------------------------------------|----------------------------------------|
| Gold Au /Au <sup>3+</sup> + 3e <sup>-</sup>                | +1,50                                  |
| Platinum Pt /Pt <sup>2+</sup> + 2e <sup>-</sup>            | +1,20                                  |
| Silver Ag /Ag <sup>+</sup> + e <sup>-</sup>                | +0,80                                  |
| Copper Cu /Cu <sup>2+</sup> + 2e <sup>-</sup>              | +0,34                                  |
| Stainless steel                                            | 0 (after few days)                     |
| Hydrogen 2H <sup>+</sup> /H <sub>2</sub> + 2e <sup>-</sup> | 0                                      |
| Lead Pb /Pb <sup>2+</sup> + 2e <sup>-</sup>                | -0,13                                  |
| Nickel Ni /Ni <sup>2+</sup> + 2e <sup>-</sup>              | -0,26                                  |
| Iron Fe /Fe <sup>2+</sup> + 2e <sup>-</sup>                | -0,447                                 |
| Chrome Cr /Cr <sup>3+</sup> + 3e <sup>-</sup>              | -0,74                                  |
| Zinc Zn /Zn <sup>2+</sup> + 2e <sup>-</sup>                | -0,76                                  |
| Zirconium Zr/Zr <sup>4+</sup> + 4e <sup>-</sup>            | -1.45                                  |
| Titane Ti /Ti <sup>2+</sup> + 2e <sup>-</sup>              | -1,63                                  |
| Aluminium Al /Al <sup>3+</sup> + 3e <sup>-</sup>           | -1,66                                  |
| Magnesium Mg /Mg <sup>2+</sup> + 2e <sup>-</sup>           | -2,37                                  |
